# Supplementary material
Source: PubMed Central journal article supplement (PMC137894)
Supplement: pnas_212410199_3.pdf [file pnas_212410199_3.pdf]

**Table 3. Necropsy and clonality results for *TCL1* transgenic mice**

| No.     | Sex | Age, mo | WBC $\times 10^4$ /ml | Spleen, g | Diagnosis  | Genotype     | (+) Flow markers            | Metastases/Spread           |
|---------|-----|---------|-----------------------|-----------|------------|--------------|-----------------------------|-----------------------------|
| K1      | F   | 4       | 1,560                 | 0.43      | DLBCL (HA) | DJH2         | IgM/B220/CD5                | BM, Thy                     |
| K2      | F   | 4       | 2,460                 | 0.4       | BLL        | Poly B/T     | ND                          |                             |
| K3      | F   | 6       | 240                   | ----      | ----       | ----         | ----                        | ----                        |
| K3 (2)  | F   | 11      | ----                  | 1.07      | ND         | DJH2/DJH4    | ND                          |                             |
| K4      | M   | 8       | 400                   | 1.07      | ND         | DJH2/DJH4    | ND                          | Liv                         |
| K5      | F   | 9       | ND                    | 0.83      | DLBCL (HA) | ND           | ND                          |                             |
| K6      | F   | 9       | ----                  | 2.87      | ND         | DJH2         | ND                          |                             |
| K7      | F   | 9       | 214                   | ----      | ----       | ----         | ----                        | ----                        |
| K7 (2)  | F   | 11      | 2,720                 | 2.56      | BLL        | DJH4         | IgM/B220/CD5                | Asc, Liv, Lu, Pan,          |
| K8      | M   | 10      | 440                   | 1.33      | DLBCL (HA) | DJH2/oligo T | B220/CD4                    | Asc, Int, Kid, Liv, Lu, Pan |
| K9      | M   | 11      | 89                    | 3.7       | DLBCL (HA) | DJH2         | ND                          | Thy                         |
| K10     | M   | 12      | 2,820                 | 1.12      | BLL        | DJH2         | IgM/B220/CD5                | Asc, Kid, Liv, Pan,Thy      |
| K11     | M   | 12      | 40                    | 2.11      | DLBCL (TR) | DJH1         | 51% CD4/20% CD8             | Liv, Thy                    |
| K12     | F   | 12      | 360                   | 0.31      | ND         | Poly B/T     | 32% IgM/B220/CD5            |                             |
| K13     | M   | 12      | 480                   | ----      | ----       | ----         | ----                        | ----                        |
| K13 (2) | M   | 13      | 95                    | 0.4       | ND         | Poly B/T     | 32% IgM/B220/CD5            |                             |
| K14     | M   | 12      | 140                   | ----      | ----       | ----         | ----                        | ----                        |
| K14 (2) | M   | 13      | 83                    | 0.95      | DLBCL (HA) | Poly B/T     | ND                          | Liv, Pan                    |
| K15     | M   | 13      | 3,400                 | 2.37      | BLL        | Poly B/T     | IgM/B220/CD5                | Kid, Liv, Lu, Sal           |
| K16     | F   | 15      | ND                    | 4         | T lymphoma | ND           | Thy1/CD8/CD5                | Thy                         |
| K17     | F   | 16      | 45                    | 0.29      | ND         | Poly B/T     | 30% IgM/B220/CD5<br>42% CD8 |                             |
| P1      | F   | 12      | 1,260                 | 1.26      | ND         | ND           | ND                          |                             |
| P2      | M   | 13      | 4,000                 | 3.35      | FBL        | Poly B/T     | IgM/B220/CD5                | BM, Int, Liv, Lu, Thy       |

Heterozygous *hTCL1* mice are listed by number and founder line. The age in months at necropsy is noted; some mice have premortem WBC counts listed and age at necropsy is denoted by a (2). The diagnosis is established by a combination of morphologic, histologic, clonality, and flow cytometric data with previously reported criteria [Hori, M., Xiang, S., Qi, C. F., Chattopadhyay, S. K., Fredrickson, T. N., Hartley, J. W., Kovalchuk, A. L., Bornkamm, G. W., Janz, S., Copeland, N. G., *et al.* (2001) *Blood Cells Mol. Dis.* **27**, 217-222; Kovalchuk, A. L., Qi, C. F., Torrey, T. A., Taddesse-Heath, L., Feigenbaum, L., Park, S. S., Gerbitz, A., Klobeck, G., Hoertnagel, K., Polack, A., *et al.* (2000) *J. Exp. Med.* **192**, 1183-1190]. Extent of tumor infiltration beyond the spleen and lymph nodes is listed for each mouse examined. ND, not determined; HA, histiocyte-associated; TR, T cell-rich; BM, bone marrow; Thy, thymus; Liv, liver; Asc, ascites; Lu,

lung; Pan, pancreas; Int, intestine; Sal, salivary gland; Kid, kidney; FBL, follicular B cell lymphoma.
