# Supplementary material
Source: PubMed Central journal article supplement (PMC137894)
Supplement: pnas_212410199_4.pdf [file pnas_212410199_4.pdf]

**Table 4. Somatic hypermutation of J<sub>H</sub> region in DLBCL, BLL, and FBL**

| Mouse | N     | D <sub>H</sub> | N                 | J <sub>H</sub>                                                             | % clones mutated | J <sub>H</sub>   | D <sub>H</sub> |
|-------|-------|----------------|-------------------|----------------------------------------------------------------------------|------------------|------------------|----------------|
| K7    | g     | TCTACTATGATTAC | ctacggctattggtgtg | TACTATGCTATGGACTACT<br>GGGGTC <u>GATGAACACCA</u><br>GCCACCGT <u>C</u> CTCA | 23.3<br>(7/30)   | J <sub>H</sub> 4 | DSP2.2         |
| P2    | ttat  | TACTA          | cgatgtagctaccc    | TACTGGTACTTCGATGTCT<br>GGGGCGCAGGGACCAC<br>GGTCACCGTCTCCTCA                | NM<br>(2/2)      | J <sub>H</sub> 1 | DSP2.n         |
| K8    | gttta | ATTAC          | tacggtag          | TAGTTTGACTACTGGGGC<br>CAAGGCACCACTCTCACA<br>GTCTCC <u>A</u> CA             | 20.0<br>(4/20)   | J <sub>H</sub> 2 | DSP2.2         |

K7 J<sub>H</sub>4: TACTATGCTATGGACTACTGGGGTCAAGGAACCTCAGTCACCGTCTCCTCA

(1) G  
(2) T  
(3) A  
(4) C  
(5) C  
(6) C  
(7) A

Somatic mutations detected in BLL (K7), FBL (P2), and DLBCL (K8) tumor lines derived from *TCL1* transgenic mice. N-region additions flanking individual D<sub>H</sub> gene segments are listed in lower case letters. The total variations detected from the germ-line J<sub>H</sub> sequence in each tumor are underlined. Shown below the table are the positions of 7 mutations detected from 30 J<sub>H</sub> region segments sequenced from tumor K7. All mutations were substitutions rather than insertions or deletions. Boldface underlined positions indicate transition-type mutations. The occurrence of four distinct transitions (Pyr → Pyr and Pur → Pur) and three independent transversions (Pyr → Pur and Pur → Pyr) is compatible with ongoing somatic hypermutation in this line. Mutations within

the  $D_H$  segments, 5' and 3' regions flanking the  $DJ_H$  segments were not observed. NM, not meaningful.
